# Supplementary material for: Discovery and Complete Genome Sequence of a Bacteriophage from an Obligate Intracellular Symbiont of a Cellulolytic Protist in the Termite Gut
Source: PubMed Central journal article supplement (PMC5478533; doi:10.1264/jsme2.me16175), 2017-03-17
Supplement: 32_112_s1.pdf [file 32_112_s1.pdf]

1 **Legends to Supplemental Figures**

2

3 **Fig. S1.** Circular representation of two chromosomes from “*Ca. Azobacteroides*  
4 *pseudotrichonymphae*” phylotype ProJPt-1. Concentric rings denote the following features  
5 (from outer to inner rings): nucleotide positions starting from base 1 of *dnaA* in chromosome  
6 1, and the predicted *oriC* in chromosome 2; protein-coding sequences (CDSs) (dark blue:  
7 CDSs on the forward strand (+), light blue: CDSs on the reverse strand (–), orange: rRNA  
8 genes, green: tRNA genes); G + C content (purple: <50%, gold: >50%); GC skew  $(G - C)/(G$   
9  $+ C)$  (purple: –, gold: +).

10

11 **Fig. S2.** Circular representation of five plasmids of “*Ca. Azobacteroides*  
12 *pseudotrichonymphae*” phylotype ProJPt-1. The concentric rings denote the following  
13 features (from outer to inner rings): nucleotide position starting from base 1 of *repA*; protein-  
14 coding sequences (CDSs) (dark blue: CDSs on the forward strand [+], light blue: CDSs on the  
15 reverse strand [-]); G + C content (purple, < 50%; gold > 50%); GC skew  $(G - C)/(G + C)$   
16 (purple, –; gold, +).

17

18 **Fig. S3.** Phylogenetic position of phylotype ProJPt-1 in “*Ca. Azobacteroides*  
19 *pseudotrichonymphae*” based on 16S rRNA gene sequences. A maximum likelihood tree was  
20 constructed using the GTR+ $\Gamma$ +I nucleotide substitution model. Bootstrap confidence values  
21 (500 resamplings) are indicated on the internal branches. *Paludibacter propionicigenes* WB4,  
22 *Bacteroides ovatus* ATCC 8483, and *Bacteroides fragilis* BOB25 were used as outgroups.

23

24 **Fig. S4.** rRNA genes on ProJPt-1 chromosomes. Putative breakpoints of the rRNA operon are  
25 shown in yellow wedges. Each of the green, blue, and orange broken lines represents identical  
26 intergenic regions between chromosomes 1 and 2.

27

28 **Fig. S5.** Synteny analysis between ProJPt-1 chromosomes and the CfPt1-2 chromosome. Red  
29 lines indicate similarly-orientated corresponding regions, while blue lines indicate regions  
30 that are oriented in opposite directions. The analysis was conducted using the Artemis  
31 Comparison Tool (<http://www.sanger.ac.uk/science/tools/artemis-comparison-tool-act>).

32

33 **Fig. S6.** Alignment of the ProJPt-Bp1 phage genome from sample PJA1 with draft genomes  
34 of ProJPt-Bp1 from samples PJA2, PJB1, and PJB2. Yellow wedges indicate tRNA gene loci.  
35 Red lines show syntenic regions. The analysis was conducted using the Artemis Comparison  
36 Tool (<http://www.sanger.ac.uk/science/tools/artemis-comparison-tool-act>). An ~3,100-bp  
37 region surrounding nucleotide position 14,000, which contains a gene for a cadherin-like beta  
38 sandwich domain protein (PJPA\_015), was unique to the ProJPt-Bp1 genome from sample  
39 PJA1.

40

41 **Fig. S7.** Neighbor-joining trees of phage-related genes based on deduced amino acid  
42 sequences. (A) Protein inside capsid D (111 amino acids); (B) dUTPase (114 amino acids).  
43 Sequences were aligned using ClustalW with a gap opening penalty of 10.0 and gap extension  
44 penalty of 0.2. The Dayhoff amino acid substitution model was used. An asterisk in panel (A)  
45 indicates the sequence from *Mollivirus sibericum*, the taxonomic assignment of which was  
46 unclear.

47

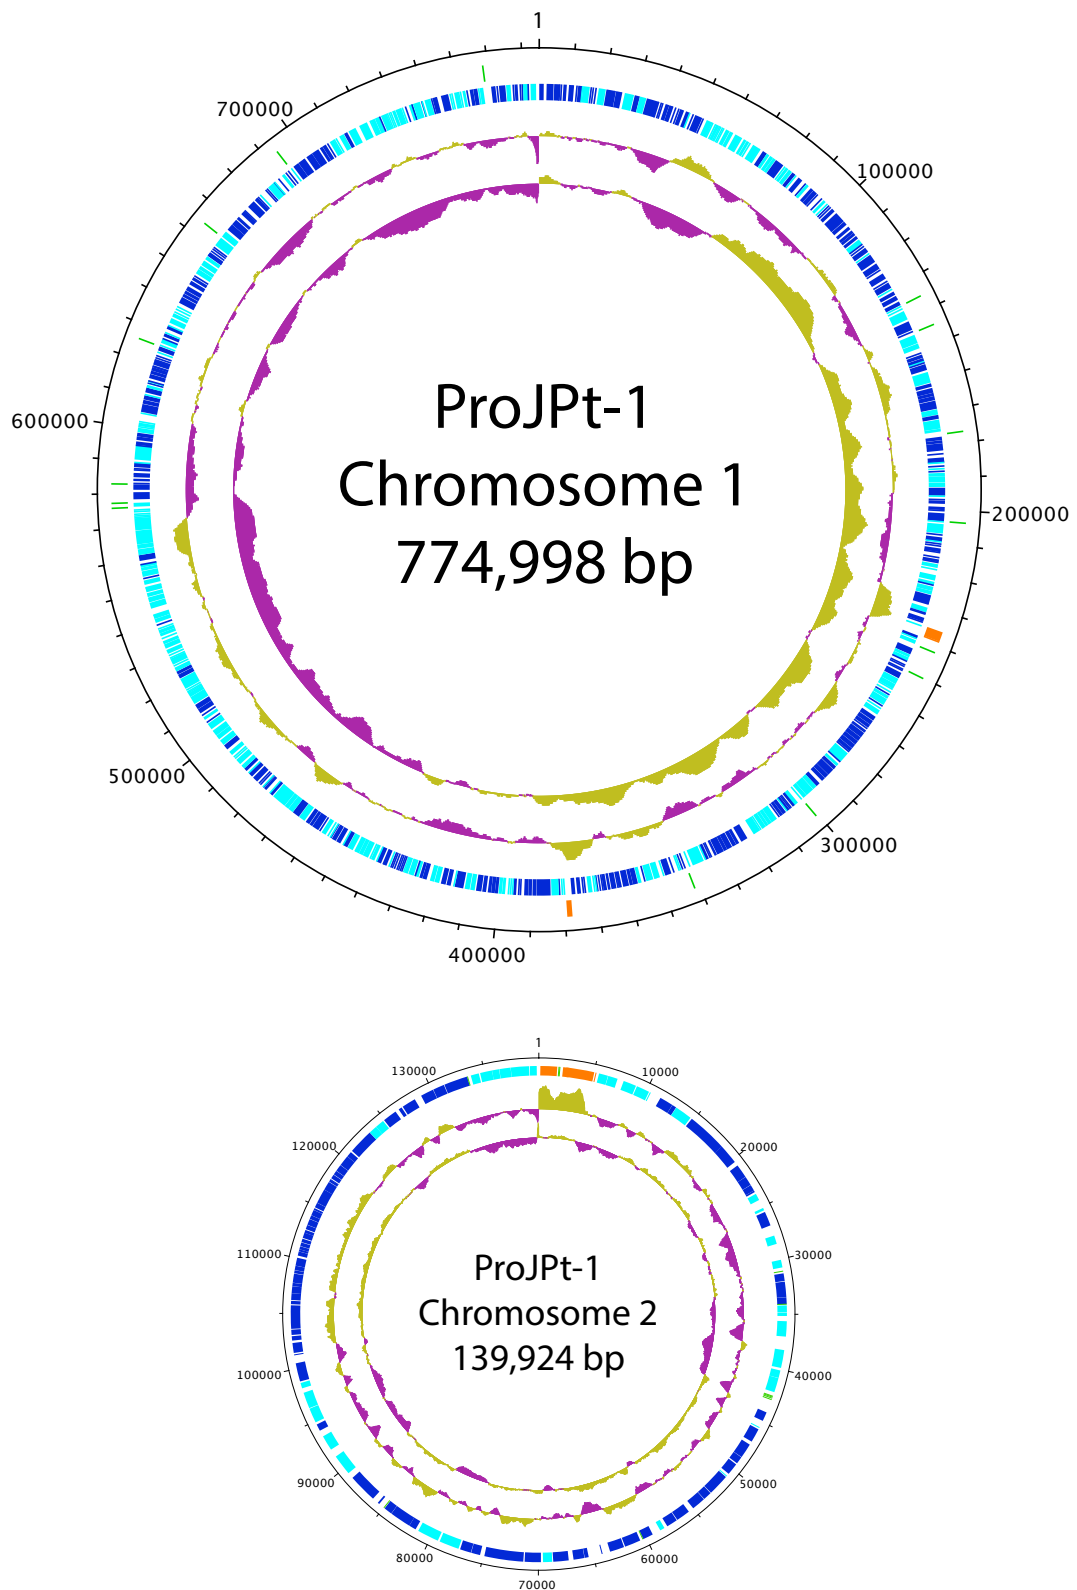

**Fig. S1.** Circular representation of two chromosomes from “*Ca. Azobacteroides pseudotrichonymphae*” phylotype ProJPt-1. Concentric rings denote the following features (from outer to inner rings): nucleotide positions starting from base 1 of *dnaA* in chromosome 1, and the predicted *oriC* in chromosome 2; protein-coding sequences (CDSs) (dark blue: CDSs on the forward strand (+), light blue: CDSs on the reverse strand (-), orange: rRNA genes, green: tRNA genes); G + C content (purple: <50%, gold: >50%); GC skew  $(G - C)/(G + C)$  (purple: -, gold: +).

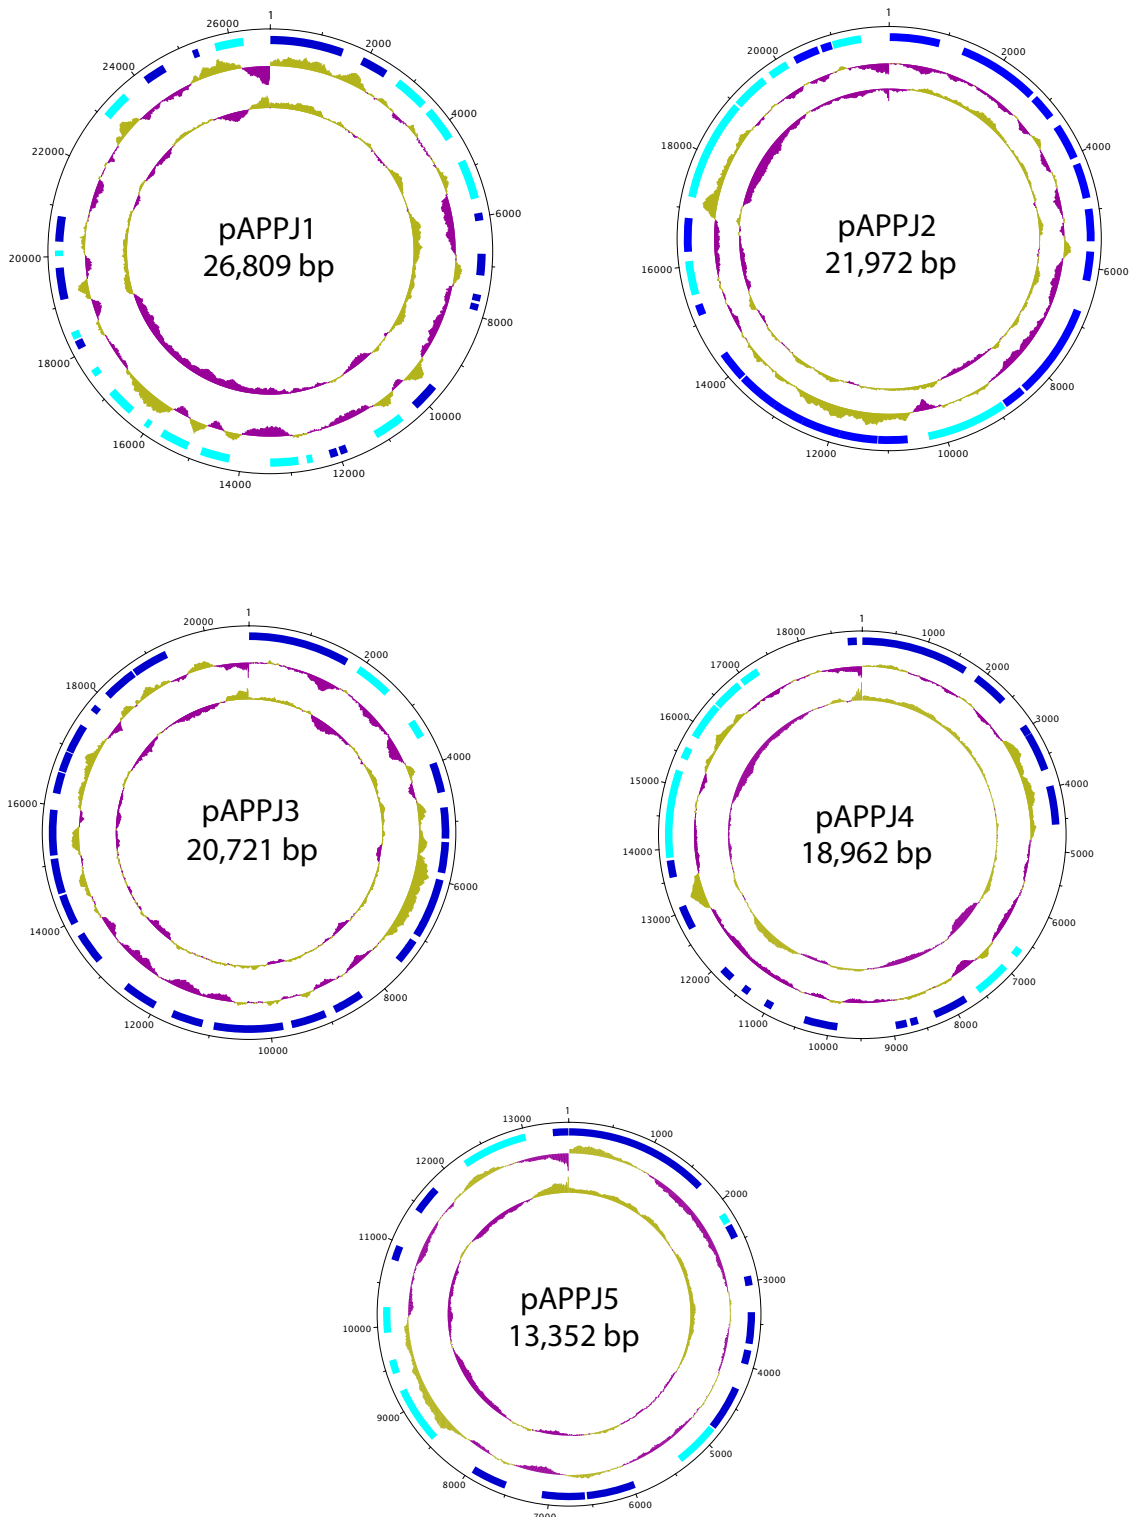

**Fig. S2.** Circular representation of five plasmids of “*Ca. Azobacteroides pseudotrichonymphae*” phylotype ProJPt-1. The concentric rings denote the following features (from outer to inner rings): nucleotide position starting from base 1 of *repA*; protein-coding sequences (CDSs) (dark blue: CDSs on the forward strand [+], light blue: CDSs on the reverse strand [-]); G + C content (purple, < 50%; gold > 50%); GC skew ( $(G - C)/(G + C)$ ) (purple, -; gold, +).

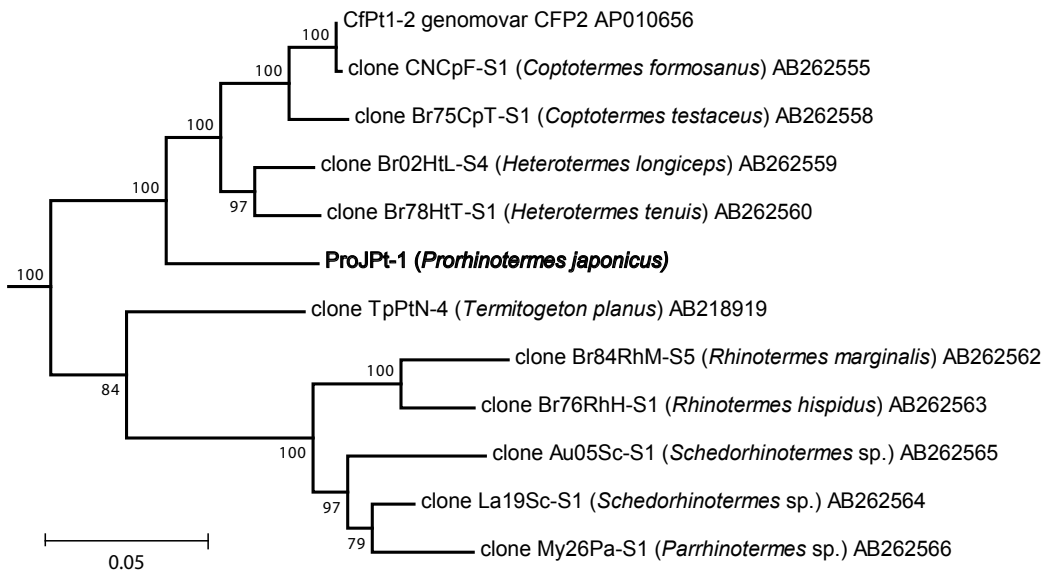

**Fig. S3.** Phylogenetic position of phylotype ProJPt-1 in “*Ca. Azobacteroides pseudotrichonymphae*” based on 16S rRNA gene sequences. A maximum likelihood tree was constructed using the GTR+ $\Gamma$ +I nucleotide substitution model. Bootstrap confidence values (500 resamplings) are indicated on the internal branches. *Paludibacter propionicigenes* WB4, *Bacteroides ovatus* ATCC 8483, and *Bacteroides fragilis* BOB25 were used as outgroups.

## rRNA operon in the ProJPt-1 Chromosome 2

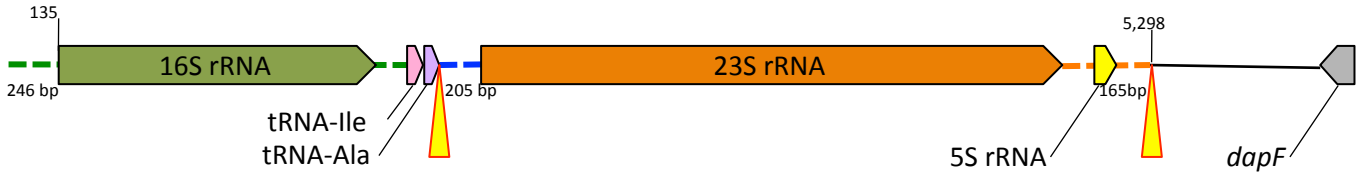

## rRNA genes in the ProJPt-1 Chromosome 1

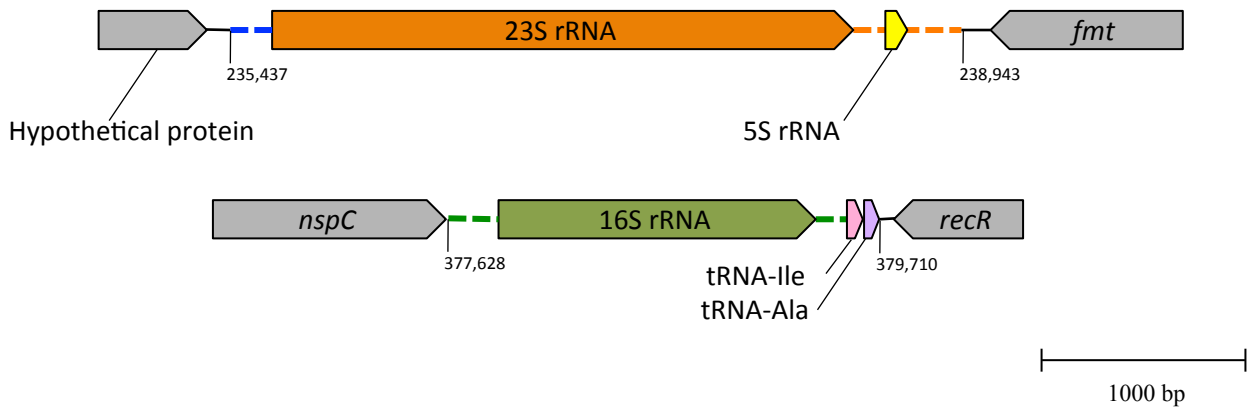

**Fig. S4.** rRNA genes on ProJPt-1 chromosomes. Putative breakpoints of the rRNA operon are shown in yellow wedges. Each of the green, blue, and orange broken lines represents identical intergenic regions between chromosomes 1 and 2.

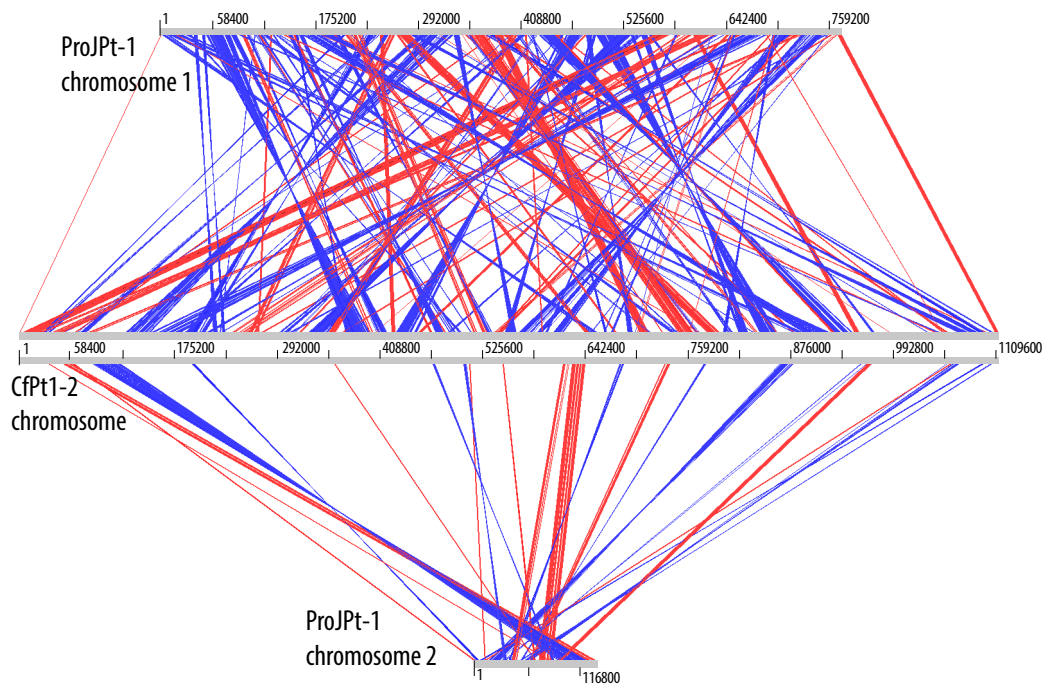

**Fig. S5.** Synteny analysis between ProJPt-1 chromosomes and the CfPt1-2 chromosome. Red lines indicate similarly-orientated corresponding regions, while blue lines indicate regions that are oriented in opposite directions. The analysis was conducted using the Artemis Comparison Tool (<http://www.sanger.ac.uk/science/tools/artemis-comparison-tool-act>).

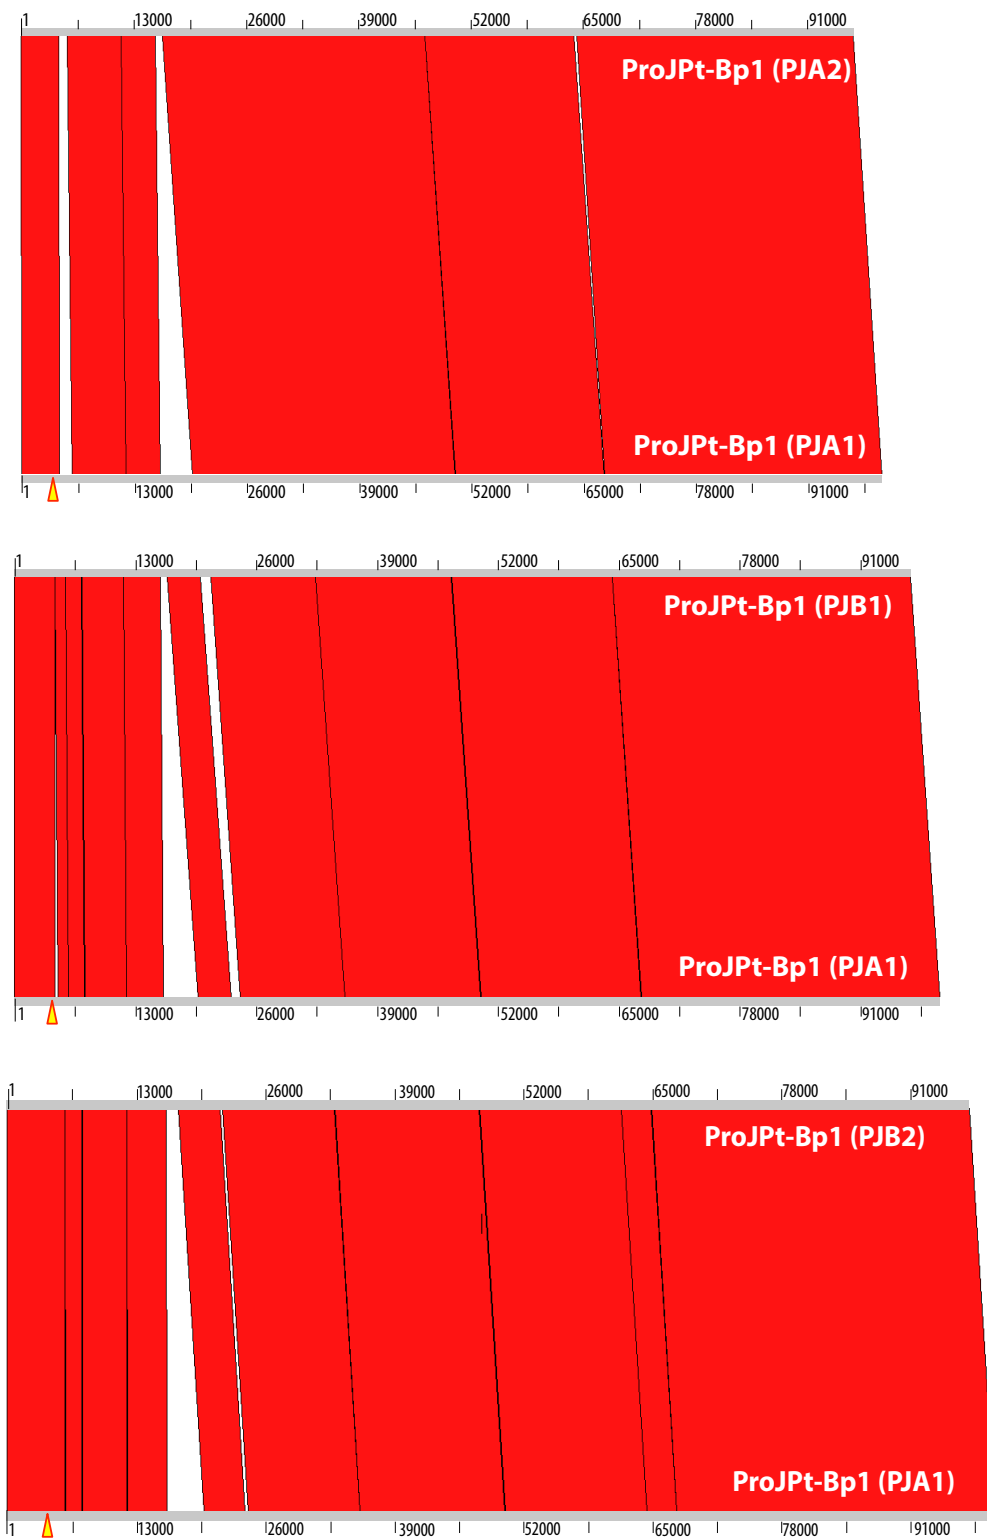

**Fig. S6.** Alignment of the ProJPt-Bp1 phage genome from sample PJA1 with draft genomes of ProJPt-Bp1 from samples PJA2, PJB1, and PJB2. Yellow wedges indicate tRNA gene loci. Red lines show syntenic regions. The analysis was conducted using the Artemis Comparison Tool (<http://www.sanger.ac.uk/science/tools/artemis-comparison-tool-act>). An ~3,100-bp region surrounding nucleotide position 14,000, which contains a gene for a cadherin-like beta sandwich domain protein (PJPA\_015), was unique to the ProJPt-Bp1 genome from sample PJA1.



Podoviridae  
Myoviridae  
Siphoviridae

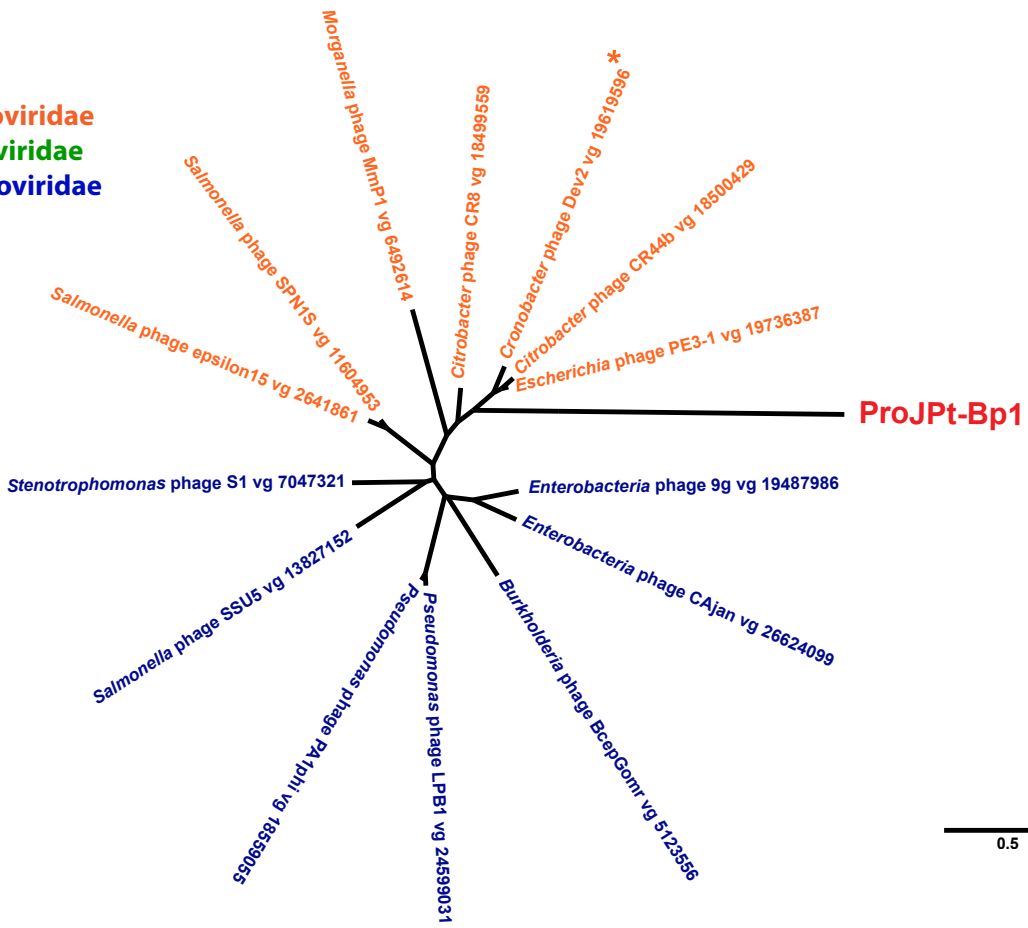

A

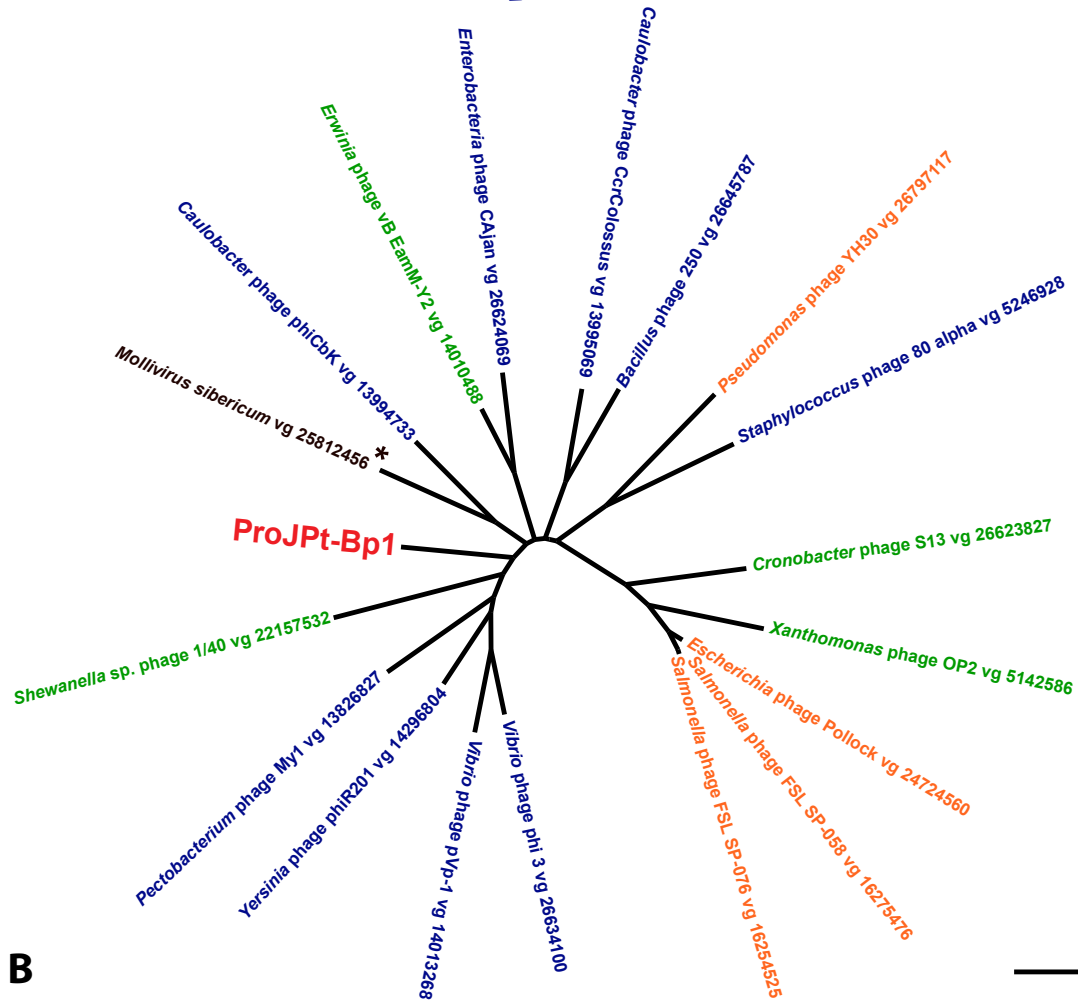

B

**Fig. S7.** Neighbor-joining trees of phage-related genes based on deduced amino acid sequences. (A) Protein inside capsid D (111 amino acids); (B) dUTPase (114 amino acids). Sequences were aligned using ClustalW with a gap opening penalty of 10.0 and gap extension penalty of 0.2. The Dayhoff amino acid substitution model was used. An asterisk in panel (A) indicates the sequence from *Mollivirus sibericum*, the taxonomic assignment of which was unclear.

**Table S1. Predicted genes on the ProJPt-Bp1 phage genome.**

| Gene_id*  | start | stop  | strand | predicted functions                                  | Source**   |
|-----------|-------|-------|--------|------------------------------------------------------|------------|
| PJPA_001  | 444   | 1     | -      | hypothetical protein                                 |            |
| PJPA_002  | 1040  | 444   | -      | hypothetical protein                                 |            |
| PJPA_003  | 1774  | 1049  | -      | hypothetical protein                                 |            |
| PJPA_004  | 2351  | 2010  | -      | hypothetical protein                                 |            |
| PJPA_005  | 2947  | 2399  | -      | hypothetical protein                                 |            |
| PJPA tRNA | 4241  | 4168  | -      | tRNA-Gln (CAG)                                       | tRNA-scan  |
| PJPA_006  | 5052  | 5672  | +      | hypothetical protein                                 |            |
| PJPA_007  | 5961  | 6296  | +      | hypothetical protein                                 |            |
| PJPA_008  | 6867  | 7556  | +      | hypothetical protein                                 |            |
| PJPA_009  | 7613  | 8083  | +      | hypothetical protein                                 |            |
| PJPA_010  | 8218  | 8805  | +      | hypothetical protein                                 |            |
| PJPA_011  | 8935  | 9546  | +      | ND2 superfamily protein                              | NCBI CDD   |
| PJPA_012  | 9543  | 13154 | +      | hypothetical protein                                 |            |
| PJPA_013  | 13236 | 14219 | +      | hypothetical protein                                 |            |
| PJPA_014  | 14392 | 14715 | +      | hypothetical protein                                 |            |
| PJPA_015  | 14719 | 19752 | +      | Cadherin-like beta sandwich domain protein           | NCBI CDD   |
| PJPA_016  | 19949 | 21370 | +      | major outer envelope glycoprotein                    | NCBI CDD   |
| PJPA_017  | 21348 | 24266 | +      | hypothetical protein                                 |            |
| PJPA_018  | 24273 | 27320 | +      | DUF4417-containing protien                           | NCBI CDD   |
| PJPA_019  | 27317 | 30310 | +      | hypothetical protein                                 |            |
| PJPA_020  | 30609 | 32669 | +      | conserved hypothetical protein                       |            |
| PJPA_021  | 32705 | 33322 | +      | hypothetical protein                                 |            |
| PJPA_022  | 33319 | 34041 | +      | hypothetical protein                                 |            |
| PJPA_023  | 34043 | 35188 | +      | hypothetical protein                                 |            |
| PJPA_024  | 35249 | 36301 | +      | hypothetical protein                                 |            |
| PJPA_025  | 36316 | 37275 | +      | hypothetical protein                                 |            |
| PJPA_026  | 37304 | 38458 | +      | VIP2; Actin-ADP-ribosylating toxin family protein    | NCBI CDD   |
| PJPA_027  | 38476 | 39948 | +      | putative structural protein                          | NR, refseq |
| PJPA_028  | 40082 | 40786 | +      | hypothetical protein                                 |            |
| PJPA_029  | 40783 | 41565 | +      | hypothetical protein                                 |            |
| PJPA_030  | 41569 | 42618 | +      | hypothetical protein                                 |            |
| PJPA_031  | 42615 | 43562 | +      | hypothetical protein                                 |            |
| PJPA_032  | 43562 | 46435 | +      | putative structural protein                          | NR, refseq |
| PJPA_033  | 46435 | 53412 | +      | hypothetical protein                                 |            |
| PJPA_034  | 53414 | 54700 | +      | hypothetical protein                                 |            |
| PJPA_035  | 54716 | 57367 | +      | hypothetical protein                                 |            |
| PJPA_036  | 57371 | 62218 | +      | Epstein-Barr virus nuclear antigen 3B domain protein | NCBI CDD   |
| PJPA_037  | 62221 | 63048 | +      | hypothetical protein                                 |            |
| PJPA_038  | 63048 | 67547 | +      | hypothetical protein                                 |            |
| PJPA_039  | 67548 | 69068 | +      | hypothetical protein                                 |            |
| PJPA_040  | 69068 | 70708 | +      | hypothetical protein                                 |            |
| PJPA_041  | 70708 | 81153 | +      | putative structural protein                          | NR, refseq |
| PJPA_042  | 81153 | 85808 | +      | hypothetical protein                                 |            |
| PJPA_043  | 85805 | 86413 | +      | hypothetical protein                                 |            |
| PJPA_044  | 86410 | 92667 | +      | hypothetical protein                                 |            |
| PJPA_045  | 93306 | 94583 | -      | hypothetical protein                                 |            |
| PJPA_046  | 94941 | 94501 | -      | deoxyuridine 5'-triphosphate nucleotidohydrolase     | NR, refseq |

|                          |                       |                       |   |                                               |            |
|--------------------------|-----------------------|-----------------------|---|-----------------------------------------------|------------|
| PJPA_047                 | 96330                 | 95398                 | - | hypothetical protein                          |            |
| PJPA_048                 | 96634                 | 96287                 | - | solute carrier families 5 and 6-like protein  | NCBI CDD   |
| <a href="#">PJPA_049</a> | <a href="#">97041</a> | <a href="#">96631</a> | - | <a href="#">phage protein inside capsid D</a> | NR, refseq |
| PJPA_050                 | 97633                 | 97034                 | - | hypothetical protein                          |            |
| PJPA_051                 | 99091                 | 98147                 | - | exonuclease VIII                              | NR, refseq |
| PJPA_052                 | 99407                 | 99099                 | - | hypothetical protein                          |            |

\* Red shows a tRNA gene; blue shows genes identified as phage-related in the METAVIR server.

\*\*National Center for Biotechnology Information Conserved Domain Database (NCBI CDD);

“non-redundant” database (NR); NCBI curated database (refseq).

**Table S2. Codon usage (%) in the CfPt1-2 chromosome, ProJPt-1 chromosomes, and the ProJPt-Bp1 phage genome.**

|   | U   | Amino acid | CfPt1-2 | ProJPt-1 | ProJpt-Bp1 | C   | Amino acid | CfPt1-2 | ProJPt-1 | ProJpt-Bp1 |
|---|-----|------------|---------|----------|------------|-----|------------|---------|----------|------------|
| U | UUC | Phe        | 20.0    | 12.2     | 53.7       | UCA | Ser        | 18.7    | 26.9     | 32.1       |
|   | UUU | Phe        | 80.0    | 87.8     | 46.3       | UCC | Ser        | 9.9     | 3.2      | 3.7        |
|   | UUA | Leu        | 36.2    | 50.7     | 29.7       | UCG | Ser        | 7.7     | 4.0      | 5.1        |
|   | UUG | Leu        | 28.0    | 20.6     | 13.3       | UCU | Ser        | 34.6    | 38.7     | 20.5       |
|   | CUA | Leu        | 9.9     | 9.3      | 24.0       | CCA | Pro        | 32.4    | 48.7     | 51.3       |
| C | CUC | Leu        | 4.1     | 1.7      | 8.6        | CCC | Pro        | 11.0    | 1.6      | 1.4        |
|   | CUG | Leu        | 5.1     | 2.4      | 7.6        | CCG | Pro        | 10.1    | 7.3      | 8.9        |
|   | CUU | Leu        | 16.7    | 15.3     | 16.7       | CCU | Pro        | 46.5    | 42.4     | 38.5       |
| A | AUA | Ile        | 33.2    | 35.7     | 49.9       | ACA | Thr        | 38.1    | 44.8     | 48.8       |
|   | AUC | Ile        | 13.0    | 7.0      | 25.2       | ACC | Thr        | 10.2    | 4.0      | 14.3       |
|   | AUU | Ile        | 53.8    | 57.3     | 24.9       | ACG | Thr        | 9.5     | 5.5      | 11.4       |
|   | AUG | Met        | 100.0   | 100.0    | 100.0      | ACU | Thr        | 42.2    | 45.7     | 25.6       |
| G | GUA | Val        | 38.4    | 38.8     | 37.9       | GCA | Ala        | 36.6    | 40.0     | 43.4       |
|   | GUC | Val        | 8.5     | 4.8      | 11.8       | GCC | Ala        | 11.0    | 5.5      | 6.8        |
|   | GUG | Val        | 14.1    | 9.9      | 21.3       | GCG | Ala        | 6.5     | 5.7      | 9.7        |
|   | GUU | Val        | 38.9    | 46.6     | 29.0       | GCU | Ala        | 45.9    | 48.9     | 40.1       |

  

|   | A   | Amino acid | CfPt1-2     | ProJPt-1    | ProJpt-Bp1  | G   | Amino acid | CfPt1-2 | ProJPt-1 | ProJpt-Bp1 |
|---|-----|------------|-------------|-------------|-------------|-----|------------|---------|----------|------------|
| U | UAC | Tyr        | 20.7        | 19.0        | 43.7        | UGC | Cys        | 22.4    | 17.8     | 33.5       |
|   | UAU | Tyr        | 79.3        | 81.0        | 56.3        | UGU | Cys        | 77.6    | 82.2     | 66.5       |
|   | UAA | STOP       | 53.3        | 62.2        | 50.9        | UGA | STOP       | 27.9    | 23.7     | 29.8       |
|   | UAG | STOP       | 18.8        | 14.0        | 19.3        | UGG | Trp        | 100.0   | 100.0    | 100.0      |
| C | CAC | His        | 19.5        | 17.2        | 27.6        | CGA | Arg        | 16.2    | 14.9     | 4.6        |
|   | CAU | His        | 80.5        | 82.8        | 72.4        | CGC | Arg        | 7.3     | 6.4      | 6.8        |
|   | CAA | Gln        | <b>77.9</b> | <b>84.9</b> | <b>47.4</b> | CGG | Arg        | 5.3     | 3.1      | 3.8        |
|   | CAG | Gln        | <b>22.1</b> | <b>15.1</b> | <b>52.6</b> | CGU | Arg        | 30.6    | 33.4     | 30.0       |
| A | AAC | Asn        | 18.8        | 14.1        | 46.1        | AGC | Ser        | 6.1     | 4.2      | 17.7       |
|   | AAU | Asn        | 81.2        | 85.9        | 53.9        | AGU | Ser        | 23.0    | 22.9     | 21.0       |
|   | AAA | Lys        | 78.2        | 88.2        | 33.5        | AGA | Arg        | 30.3    | 34.6     | 34.0       |
|   | AAG | Lys        | 21.8        | 11.8        | 66.5        | AGG | Arg        | 10.2    | 7.6      | 20.9       |
| G | GAC | Asp        | 18.5        | 13.8        | 38.7        | GGA | Gly        | 43.1    | 49.5     | 33.4       |
|   | GAU | Asp        | 81.5        | 86.2        | 61.3        | GGC | Gly        | 8.3     | 7.9      | 16.2       |
|   | GAA | Glu        | 79.9        | 85.8        | 48.0        | GGG | Gly        | 16.8    | 14.6     | 11.9       |
|   | GAG | Glu        | 20.1        | 14.2        | 52.0        | GGU | Gly        | 31.9    | 28.0     | 38.4       |

Blue indicates codons of which corresponding tRNA genes are present in both ProJPt-1 and CfPt1-2 genomes; green indicates those only in ProJPt-1; orange indicates those only in CfPt1-2; yellow indicates those in both CfPt1-2 and ProJPt-Bp1 (absent in ProJPt-1).
